# Supplementary material for: Different involvement of medial prefrontal cortex and dorso-lateral striatum in automatic and controlled processing of a future conditioned stimulus
Source: PubMed Central journal article supplement (PMC5730208; doi:10.1371/journal.pone.0189630), 2017-12-14
Supplement: pone.0189630.s001.pdf [file pone.0189630.s001.pdf]

Experiment 1

|                  | day 1 | day 2 | day 3 | day 4 | day 5 | conditioning | test |
|------------------|-------|-------|-------|-------|-------|--------------|------|
| N-exp sham       | -     | -     | -     | -     | -     | 11,57        | 0,7  |
| N-exp sham       | -     | -     | -     | -     | -     | 10,7         | 0,9  |
| N-exp sham       | -     | -     | -     | -     | -     | 6,6          | 0,7  |
| N-exp sham       | -     | -     | -     | -     | -     | 10,6         | 0,4  |
| N-exp sham       | -     | -     | -     | -     | -     | 8,6          | 0,5  |
| N-exp sham       | -     | -     | -     | -     | -     | 7,16         | 1,1  |
| N-exp sham       | -     | -     | -     | -     | -     | 8,71         | 0,8  |
| N-exp dls lesion | -     | -     | -     | -     | -     | 9,17         | 0,86 |
| N-exp dls lesion | -     | -     | -     | -     | -     | 9,15         | 3,88 |
| N-exp dls lesion | -     | -     | -     | -     | -     | 14,71        | 0,45 |
| N-exp dls lesion | -     | -     | -     | -     | -     | 12,04        | 1,38 |
| N-exp dls lesion | -     | -     | -     | -     | -     | 7,92         | 0,56 |
| N-exp dls lesion | -     | -     | -     | -     | -     | 9,98         | 0,42 |
| N-exp dls lesion | -     | -     | -     | -     | -     | 10,72        | 0,44 |
| L-exp sham       | -     | -     | -     | 10,97 | 10,43 | 13,93        | 4,1  |
| L-exp sham       | -     | -     | -     | 11,36 | 9,42  | 11,95        | 5,73 |
| L-exp sham       | -     | -     | -     | 6,01  | 9,24  | 14,19        | 4,32 |
| L-exp sham       | -     | -     | -     | 8,98  | 10,24 | 11,5         | 5,16 |
| L-exp sham       | -     | -     | -     | 8,36  | 11,27 | 15,01        | 2,77 |
| L-exp sham       | -     | -     | -     | 9,62  | 9,68  | 13,76        | 7,11 |
| L-exp sham       | -     | -     | -     | 9,34  | 9,14  | 12,36        | 3,39 |
| L-exp sham       | -     | -     | -     | 5,75  | 8,1   | 11,92        | 5,9  |
| L-exp sham       | -     | -     | -     | 4,22  | 9,92  | 10,23        | 3,24 |
| L-exp sham       | -     | -     | -     | 7,42  | 8,58  | 13,8         | 3,22 |
| L-exp dls lesion | -     | -     | -     | 7,54  | 16,36 | 17,34        | 4,42 |
| L-exp dls lesion | -     | -     | -     | 9,13  | 9,81  | 9,3          | 3,35 |
| L-exp dls lesion | -     | -     | -     | 10,92 | 10,67 | 10,94        | 4,7  |
| L-exp dls lesion | -     | -     | -     | 13,33 | 14,37 | 15,91        | 5,37 |
| L-exp dls lesion | -     | -     | -     | 9,89  | 9,37  | 10,54        | 6,23 |
| L-exp dls lesion | -     | -     | -     | 7,04  | 8,73  | 9,49         | 7,9  |
| L-exp dls lesion | -     | -     | -     | 10,03 | 9,77  | 9,65         | 5,93 |
| L-exp dls lesion | -     | -     | -     | 9,25  | 8,03  | 13,25        | 5,13 |
| L-exp dls lesion | -     | -     | -     | 8,34  | 8,69  | 9,92         | 5,7  |
| L-exp dls lesion | -     | -     | -     | 7,7   | 5,89  | 10,46        | 5,08 |
| E-exp sham       | 4,2   | 9,9   | 9,2   | 9,5   | 12,8  | 8,1          | 9,2  |
| E-exp sham       | 5,1   | 10,1  | 9,4   | 12,6  | 11,4  | 12,8         | 12,4 |
| E-exp sham       | 0,6   | 12,3  | 14,7  | 15,3  | 14,3  | 15,7         | 11,3 |
| E-exp sham       | 8,3   | 1,5   | 10,2  | 7,8   | 11,6  | 10,7         | 6,9  |
| E-exp sham       | 11,7  | 12,6  | 13,8  | 11,7  | 14,1  | 16,3         | 10,7 |
| E-exp sham       | 8,27  | 8,19  | 7,86  | 9,55  | 8,8   | 10,07        | 9,61 |
| E-exp sham       | 5,7   | 11,4  | 9,97  | 10,38 | 9,61  | 9,27         | 8,08 |
| E-exp dls lesion | 9,3   | 10,5  | 9,3   | 10,7  | 9,9   | 12,2         | 3,16 |
| E-exp dls lesion | 6,3   | 8,8   | 10,2  | 8,7   | 9     | 9            | 2,18 |

|                  |      |      |      |      |      |      |     |
|------------------|------|------|------|------|------|------|-----|
| E-exp dls lesion | 6    | 8    | 7,9  | 8,7  | 10,7 | 12,4 | 3,2 |
| E-exp dls lesion | 7,2  | 12,2 | 13   | 17,3 | 13,8 | 16,4 | 9,3 |
| E-exp dls lesion | 11,4 | 14,5 | 14,7 | 12,1 | 10,8 | 14,5 | 2,4 |
| E-exp dls lesion | 8,2  | 16,7 | 15   | 15,2 | 14,9 | 15   | 1,1 |
| E-exp dls lesion | 6,9  | 12,2 | 9,3  | 13,8 | 11,8 | 16,1 | 1,7 |

## Experiment 2

|                  | day 1 | day 2 | day 3 | day 4 | day 5 | conditioning | test  |
|------------------|-------|-------|-------|-------|-------|--------------|-------|
| N-exp sham       | -     | -     | -     | -     | -     | 11,72        | 1,52  |
| N-exp sham       | -     | -     | -     | -     | -     | 9,84         | 0,57  |
| N-exp sham       | -     | -     | -     | -     | -     | 9,66         | 0,87  |
| N-exp sham       | -     | -     | -     | -     | -     | 11,39        | 2,81  |
| N-exp sham       | -     | -     | -     | -     | -     | 9,25         | 0,88  |
| N-exp sham       | -     | -     | -     | -     | -     | 9,69         | 0,63  |
| N-exp mpc lesion | -     | -     | -     | -     | -     | 10,23        | 0,61  |
| N-exp mpc lesion | -     | -     | -     | -     | -     | 12,45        | 0,52  |
| N-exp mpc lesion | -     | -     | -     | -     | -     | 7,07         | 0,2   |
| N-exp mpc lesion | -     | -     | -     | -     | -     | 8,95         | 0,49  |
| N-exp mpc lesion | -     | -     | -     | -     | -     | 8,5          | 0,51  |
| N-exp mpc lesion | -     | -     | -     | -     | -     | 6,56         | 0,46  |
| L-exp sham       | -     | -     | -     | 3,82  | 6,74  | 9,24         | 3,59  |
| L-exp sham       | -     | -     | -     | 6,19  | 7,12  | 8,3          | 2,35  |
| L-exp sham       | -     | -     | -     | 4,9   | 1,81  | 9,86         | 2,32  |
| L-exp sham       | -     | -     | -     | 5,99  | 1,56  | 6,88         | 7,25  |
| L-exp sham       | -     | -     | -     | 6,66  | 5     | 9,09         | 5,64  |
| L-exp sham       | -     | -     | -     | 4,22  | 9,92  | 10,23        | 3,24  |
| L-exp sham       | -     | -     | -     | 11,78 | 13,08 | 9,8          | 7,9   |
| L-exp sham       | -     | -     | -     | 4,05  | 8,86  | 12,78        | 3,52  |
| L-exp sham       | -     | -     | -     | 7,42  | 8,58  | 13,8         | 3,22  |
| L-exp sham       | -     | -     | -     | 7,99  | 9,41  | 8,71         | 6,31  |
| L-exp mpc lesion | -     | -     | -     | 6,65  | 8,16  | 8,41         | 7,36  |
| L-exp mpc lesion | -     | -     | -     | 9,47  | 5,87  | 9,6          | 8,76  |
| L-exp mpc lesion | -     | -     | -     | 7,28  | 6,98  | 8,89         | 5,47  |
| L-exp mpc lesion | -     | -     | -     | 2,62  | 6,96  | 8,91         | 6     |
| L-exp mpc lesion | -     | -     | -     | 7,88  | 9,81  | 11,49        | 6,79  |
| L-exp mpc lesion | -     | -     | -     | 7,34  | 9,53  | 11,2         | 4,23  |
| L-exp mpc lesion | -     | -     | -     | 8,18  | 6,22  | 7,8          | 5,54  |
| L-exp mpc lesion | -     | -     | -     | 8,19  | 6,31  | 10,98        | 9,05  |
| L-exp mpc lesion | -     | -     | -     | 7,7   | 9,26  | 9,9          | 7,65  |
| L-exp mpc lesion | -     | -     | -     | 7,6   | 7,6   | 10,18        | 10,9  |
| L-exp mpc lesion | -     | -     | -     | 14,08 | 7,84  | 6,11         | 6,4   |
| L-exp mpc lesion | -     | -     | -     | 8,87  | 9,26  | 6,6          | 9,31  |
| L-exp mpc lesion | -     | -     | -     | 8,96  | 13,32 | 12,04        | 15,51 |

|                  |      |       |       |       |       |       |       |
|------------------|------|-------|-------|-------|-------|-------|-------|
| E-exp sham       | 8    | 10    | 11,33 | 7,3   | 10,74 | 9,69  | 11,05 |
| E-exp sham       | 8    | 8,6   | 9,7   | 8,29  | 9,45  | 7,01  | 9     |
| E-exp sham       | 7,08 | 11,6  | 12,46 | 10,38 | 12,3  | 15,06 | 5,66  |
| E-exp sham       | 8,27 | 8,19  | 7,86  | 9,55  | 8,8   | 10,07 | 9,61  |
| E-exp sham       | 5,7  | 11,4  | 9,97  | 10,38 | 9,61  | 9,27  | 8,08  |
| E-exp sham       | 8,97 | 10,52 | 9,75  | 10,54 | 9,82  | 10,75 | 9,41  |
| E-exp sham       | 8,34 | 10,14 | 8,22  | 9,52  | 10,53 | 10,37 | 9,27  |
| E-exp sham       | 7,18 | 12,2  | 10,79 | 11,37 | 13,59 | 11,66 | 5,38  |
| E-exp mpc lesion | 5,22 | 9,58  | 3,95  | 5,95  | 7,43  | 9,03  | 5,22  |
| E-exp mpc lesion | 5,77 | 11,3  | 5,78  | 12,67 | 12,15 | 14,17 | 5,77  |
| E-exp mpc lesion | 7,44 | 9,56  | 8,64  | 9,3   | 11,37 | 10,37 | 7,44  |
| E-exp mpc lesion | 8,07 | 10,97 | 4,95  | 7,06  | 6,99  | 11,47 | 8,07  |
| E-exp mpc lesion | 9,7  | 6,79  | 5,46  | 7,82  | 8,01  | 8,75  | 9,7   |
| E-exp mpc lesion | 8,7  | 9,97  | 9,5   | 10,23 | 10,35 | 11,52 | 8,7   |
| E-exp mpc lesion | 10,6 | 10    | 11,33 | 9,26  | 11,2  | 10,19 | 12,84 |
| E-exp mpc lesion | 8    | 8,6   | 10,37 | 9,69  | 10,09 | 7,38  | 9,07  |
